# Supplementary material
Source: publisher figshare collection journal article supplement (https://geolsoc.figshare.com/ndownloader/files/5422835)
Supplement: Supplementary file 1 [file 5422835]

Table 2 SHRIMP U-Pb isotopic data for zircons of the gabbro samples from the Tudun and Huangshannan complexes
Spot	U	Th	Th/U	206Pba	206Pbb	Radiogenic ratios							Ages (Ma)
	ppm	ppm		ppm	%	207Pb/206Pb	±%	207Pb/235U	±%	206Pb/238U	±%		206Pb/238U	±1?	207Pb/206Pb	±1?	208Pb/232Th	±1?
Tudun complex
TDS-1-1.1	575	362	0.63	22.0	0.00	0.0523	2.1	0.32	2.6	0.0446	1.6		281.2	4.4	298	47	281	7
TDS-1-2.1	175	96	0.55	6.8	1.15	0.0486	7.0	0.30	7.3	0.0451	2.1		284.4	5.8	126	164	256	14
TDS-1-3.1	203	124	0.61	7.8	1.58	0.0451	12.6	0.28	12.9	0.0443	2.8		279.2	7.5	-50	307	251	23
TDS-1-4.1	536	469	0.88	20.0	0.35	0.0498	3.5	0.30	3.9	0.0433	1.6		273.0	4.4	183	83	259	7
TDS-1-5.1	204	118	0.58	7.9	1.36	0.0475	11.4	0.29	11.7	0.0447	2.6		282.0	7.1	73	271	263	23
TDS-1-6.1	323	200	0.62	12.2	0.74	0.0507	6.3	0.30	6.8	0.0436	2.6		275.3	7.0	226	145	278	13
TDS-1-7.1	326	201	0.61	12.7	0.63	0.0513	5.3	0.32	5.5	0.0450	1.7		283.6	4.9	253	121	270	9
TDS-1-8.1	291	280	0.96	11.6	0.72	0.0523	6.4	0.33	6.6	0.0459	1.8		289.1	5.1	296	145	273	10
TDS-1-9.1	223	120	0.54	8.4	0.73	0.0512	6.9	0.31	7.2	0.0435	2.3		274.7	6.2	249	158	279	16
TDS-1-10.1	339	228	0.67	13.1	0.78	0.0473	8.0	0.29	8.2	0.0445	2.0		280.9	5.5	62	190	271	15
TDS-1-11.1	84	41	0.49	3.3	2.85	0.0455	28.5	0.27	28.7	0.0437	3.0		276.0	8.2	-28	691	217	59
TDS-1-12.1	84	29	0.34	3.3	3.51	0.0492	24.3	0.30	24.5	0.0440	2.7		277.5	7.4	156	569	275	62
TDS-1-13.1	307	252	0.82	11.8	0.67	0.0514	6.2	0.31	6.5	0.0443	1.8		279.4	4.9	257	143	277	13
Huangshannan complex
HUI3-1.1	285	118	0.41	10.8	1.99	0.0534	12.1	0.32	12.6	0.0431	3.4		272.0	9.0	344	274	267	31
HUI3-2.1	883	682	0.77	30.9	0.55	0.0537	3.2	0.30	4.5	0.0405	3.2		256.0	8.2	359	72	252	9
HUI3-3.1	408	187	0.46	15.3	1.14	0.0553	5.8	0.33	6.7	0.0433	3.3		273.2	8.8	423	130	293	16
HUI3-4.1	323	141	0.44	12.5	1.92	0.0531	7.8	0.32	8.5	0.0441	3.5		278.3	9.4	334	176	284	23
HUI3-5.1	828	227	0.27	30.0	0.57	0.0524	4.0	0.30	5.2	0.0419	3.3		264.7	8.4	302	92	275	18
HUI3-6.1	342	139	0.41	12.8	1.24	0.0550	5.4	0.33	6.3	0.0429	3.3		271.0	8.8	411	120	294	20
HUI3-7.1	472	221	0.47	17.7	0.88	0.0562	5.3	0.33	6.2	0.0432	3.3		272.5	8.8	459	117	285	16
HUI3-8.1	336	160	0.48	13.0	2.52	0.0456	9.6	0.28	10.1	0.0440	3.3		277.7	9.1	-26	232	254	23
HUI3-9.1	250	114	0.46	9.4	3.33	0.0472	22.8	0.28	23.1	0.0424	3.6		267.4	9.4	62	543	261	50
HUI3-10.1	618	206	0.33	22.6	0.42	0.0572	3.6	0.33	4.9	0.0424	3.3		267.5	8.6	498	79	297	15
HUI3-11.1	244	63	0.26	9.6	4.57	0.0401	26.8	0.24	27.1	0.0436	3.5		275.1	9.5	-342	692	140	86
HUI3-12.1	232	78	0.34	9.3	4.28	0.0432	30.9	0.27	31.2	0.0445	3.7		280.6	10.1	-156	769	220	86
HUI3-13.1	485	243	0.50	17.7	0.24	0.0596	3.4	0.35	4.7	0.0423	3.3		267.3	8.6	591	73	309	12
a Indicates the radiogenic Pb content; b Indicates the common Pb content
The zircon U–Pb analyses were performed using a Sensitive High-Resolution Ion Microprobe (SHRIMP II) at the Beijing SHRIMP Centre, Chinese Academy of Geological Sciences.
